# Supplementary material
Source: PubMed Central journal article supplement (PMC7271467)
Supplement: NIHMS1577906-supplement-supplemental.pdf [file NIHMS1577906-supplement-supplemental.pdf]

AIF-1 expression in CD45<sup>+</sup> cells in atherosclerotic lesion

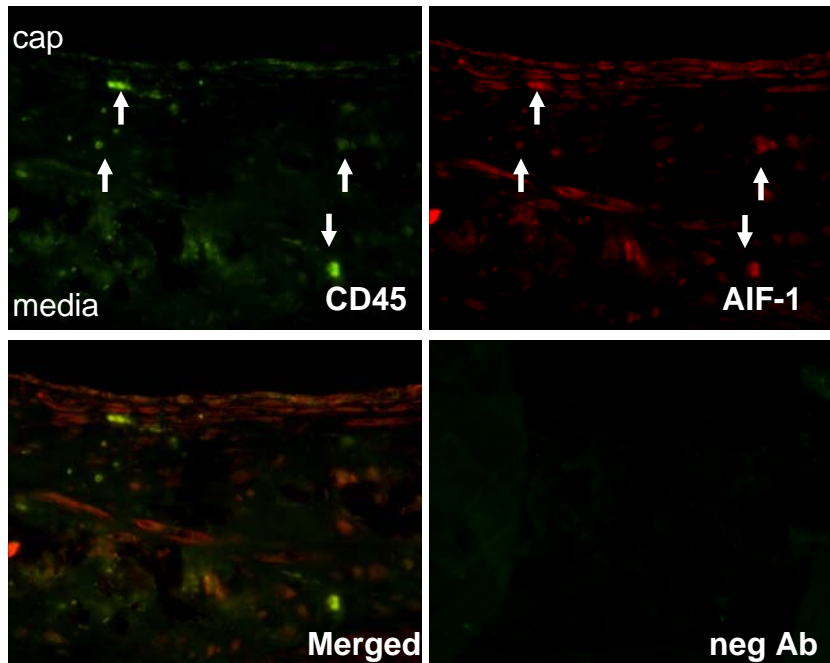

Fluorescence immunohistochemistry of AIF-1 expression in atherosclerotic lesion from ApoE<sup>-/-</sup> mouse fed normal chow. Co-localization of AIF-1 antibody (red) with CD45<sup>+</sup> cells (green), merged, and negative control. Arrows point to examples of co-positive VSMC. 600X magnification for all.

## AIF-1 transgene expression

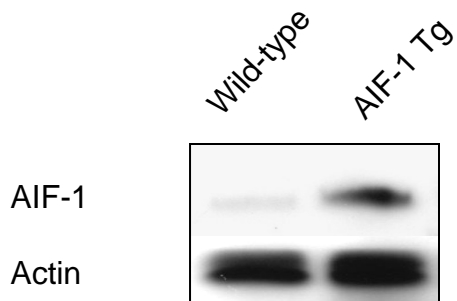

Abdominal aorta from AIF-1 transgenic and wild-type mice were homogenized and proteins immunoblotted with anti-AIF-1 and anti-actin antibody. Construction of and tissue-specific expression of the AIF-1 transgene is described in detail in reference 10.

AIF-1 over expression does not increase SRA(1) nor CXCL16 mRNA

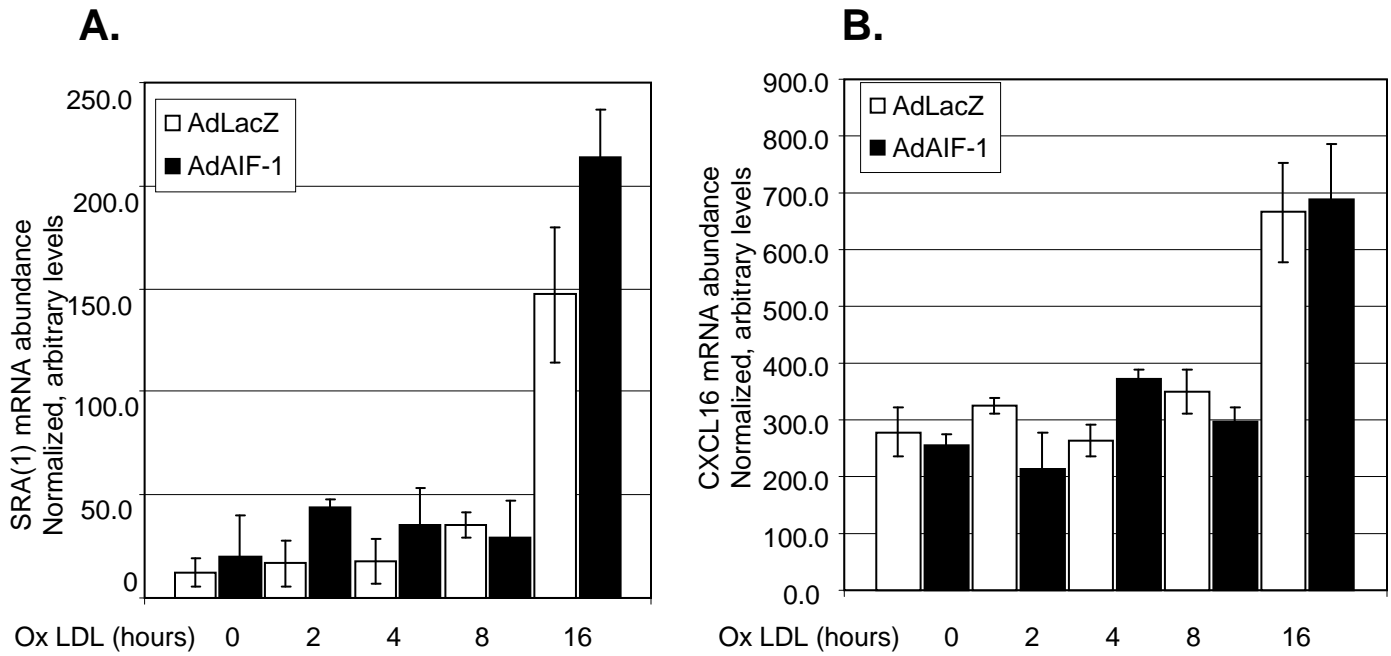

**A., B.,** Neither SRA(1) nor CXCL16 mRNA levels were significantly different between AdAIF-1 and AdLacZ transduced VSMC. Data shown from at least three independently performed experiments.
